# Supplementary material for: Live birth rates with and without preimplantation genetic testing: a single-center retrospective study
Source: Research Square preprint supplement (doi:10.21203/rs.3.rs-7203090/v1), 2025-08-11
Supplement: Supplementary file 1 [file 17a7701e04dadd06be2010eb.docx]

**Supplementary Table**

| **A** | **PGT vs. IVF** | | | **PGT-A vs. IVF** | | | **PGT-M vs. IVF** | | | **PGT-SR vs. IVF** | | |
| --- | --- | --- | --- | --- | --- | --- | --- | --- | --- | --- | --- | --- |
| OR | *p* | | OR | | *p* | OR | *p* | | OR | | *p* |
| agonist long protocol | 0.6842（0.3163-1.458） | 0.3291 | | 0.6082（0.2042-1.797） | | 0.3622 | 0.6842（0.1028-4.606） | 0.7117 | | 0.7412（0.2974-1.875） | | 0.5273 |
| antagonist protocol | 0.4729（0.2144-1.018） | 0.053 | | 0.7048（0.2305-2.278） | | 0.5428 | 0.5286（0.02748-10.29） | 0.6502 | | 0.3524（0.1315-0.9369） | | 0.0321 |
| PPOS protocol | 0.2479（0.07427-0.8627） | 0.0228 | | 0.2014（0.05822-0.7182） | | 0.0127 | 0.2411（0.05911-1.041） | 0.0681 | | 0.3000（0.08675-1.046） | | 0.0652 |
| down-regulation combined with hormone replacement cycle | 0.4501（0.2701-0.7443） | 0.0016 | | 0.3875（0.2137-0.7217） | | 0.0021 | 0.4096（0.1562-1.081） | 0.0759 | | 0.5267（0.2863-0.9575） | | 0.0338 |
| hormone replacement cycle | 0.000（0.000-7.077） | 0.3458 | | 0.000（0.000-18.00） | | 0.4386 | N/A | N/A | | 0.000（0.000-9.000） | | 0.2482 |
| ovulation induction cycle | Infinity (0.3717-infinity) | 0.1473 | | Infinity (0.07407-infinity) | | 0.3613 | N/A | N/A | | Infinity (0.2290-infinity) | | 0.2207 |
| natural ovulation cycle | 0.9910（0.4422-2.157） | 0.982 | | 1.216（0.3417-4.090） | | 0.7766 | 2.432（0.3437-32.52） | 0.4385 | | 0.8108（0.3383-1.940） | | 0.6502 |
| **B** | **PGT-A vs. PGT-SR** | | | | **PGT-M vs. PGT-SR** | | | | **PGT-A vs. PGT-M** | | | |
| OR | | *p* | | OR | | *p* | | OR | | *p* | |
| agonist long protocol | 0.9479（0.2448-3.488） | | 0.9348 | | 1.083（0.1510-7.733） | | 0.9408 | | 0.8889（0.1185-6.736） | | 0.9156 | |
| antagonist protocol | 0.5000（0.1334-2.180） | | 0.3243 | | 0.6667（0.03268-14.12） | | 0.9408 | | 1.333（0.06088-28.16） | | 0.8489 | |
| PPOS protocol | 1.490（0.7059-2.977） | | 0.2799 | | 1.244（0.4404-3.847） | | 0.6983 | | 0.8354（0.2904-2.641） | | 0.7524 | |
| down-regulation combined with hormone replacement cycle | 1.359（0.7203-2.596） | | 0.3463 | | 1.286（0.4730-3.491） | | 0.6300 | | 0.9459（0.3424-2.613） | | 0.916 | |
| hormone replacement cycle | 0.3333（0.01360-12.26） | | 0.5403 | | N/A | | N/A | | N/A | | N/A | |
| ovulation induction cycle | N/A | | N/A | | N/A | | N/A | | N/A | | N/A | |
| natural ovulation cycle | 0.6667（0.1805-2.686） | | 0.5904 | | 0.333（0.02407-2.577） | | 0.3508 | | 0.5000（0.03152-4.755） | | 0.5967 | |

**Supplementary Table 1. Odds ratios and p-values for comparisons between subgroups.**

|  | | PGT | PGT-A | PGT-M | PGT-SR | IVF |
| --- | --- | --- | --- | --- | --- | --- |
| **Controlled ovarian hyperstimulation protocols** | | | | | | |
| agonist long protocol vs. antagonist protocol | OR | 0.8947（0.3604-2.190） | 1.500（0.3968-5.983） | 1.000（0.03612-27.69） | 0.6154（0.1928-2.186） | 1.294（0.6764-2.441） |
| *p* | 0.8028 | 0.5761 | >0.9999 | 0.4227 | 0.4277 |
| agonist long protocol vs. PPOS protocol | OR | 1.322（0.6904-2.534） | 1.208（0.3995-3.513） | 1.286（0.1666-9.694） | 1.477（0.5837-3.687） | 3.649（1.047-12.60） |
| *p* | 0.4132 | 0.7328 | 0.8222 | 0.4101 | 0.0462 |
| antagonist protocol vs. PPOS protocol | OR | 1.478（0.7257-3.068） | 0.8056（0.2286-2.378） | 1.286（0.05985-26.85） | 2.400（0.8242-7.001） | 2.819（0.7737-9.542） |
| *p* | 0.2973 | 0.7195 | 0.8668 | 0.0893 | 0.1049 |
| **Endometrial preparation protocols** | | | | | | |
| down-regulation combined with hormone replacement cycle vs. hormone replacement cycle | OR | 1.820（0.4137-9.739） | 3.171（0.4485-42.15） | N/A | 0.7778（0.04014-15.16） | Infinity (0.1846-infinity) |
| *p* | 0.49 | 0.3042 | N/A | 0.8604 | 0.367 |
| down-regulation combined with hormone replacement cycle vs. ovulation induction cycle | OR | Infinity (0.8368-infinity) | Infinity (0.1142-infinity) | N/A | Infinity (0.3459-infinity) | 0.4096（0.06275-2.719） |
| *p* | 0.1011 | 0.3073 | N/A | 0.2166 | 0.3677 |
| down-regulation combined with hormone replacement cycle vs. natural ovulation cycle | OR | 1.112（0.5614-2.287） | 1.586（0.4419-5.288） | 3.000（0.3652-42.70） | 0.7778（0.3374-1.792） | 0.5052（0.2726-0.9318） |
| *p* | 0.7628 | 0.4997 | 0.4997 | 0.5781 | 0.0313 |
| hormone replacement cycle vs. ovulation induction cycle | OR | Infinity (0.2300-infinity) | Infinity (0.02778-infinity) | N/A | Infinity (0.1111-infinity) | 0.000（0.000-4.367） |
| *p* | 0.2568 | 0.5762 | N/A | 0.2482 | 0.2207 |
| hormone replacement cycle vs. natural ovulation cycle | OR | 0.6111（0.1078-2.926） | 0.5000（0.03152-4.755） | N/A | 1.000（0.04921-20.32） | 0.000（0.000-2.795） |
| *p* | 0.5909 | 0.5967 | N/A | >0.9999 | 0.2081 |
| ovulation induction cycle vs. natural ovulation cycle | OR | Infinity (0.6433-infinity) | Infinity (0.06349-infinity) | N/A | Infinity (0.4084-infinity) | 0.8108（0.1219-5.426） |
| *p* | 0.1276 | 0.4279 | N/A | 0.1719 | 0.8384 |

**Supplementary Table 2. Odds ratios and p-values for comparisons between subgroups.**
